# Supplementary material for: An amino acid-derived ABCBA-type antifouling biohybrid with multi-stimuli responsivity and contaminant removal capability
Source: Royal Society of Chemistry journal article supplement (doi:10.1039/d2py00280a), 2022-01-01
Supplement: d2py00280a1.pdf [file d2py00280a1.pdf]

**Electronic Supplementary Information**

**An amino acid-derived ABCBA-type antifouling biohybrid with multi-stimuli responsivity and contaminant removal capability**

Devendra Kumar,<sup>†</sup> Sk Arif Mohammad,<sup>†</sup> Anand Kumar,<sup>†</sup> Shivshankar R. Mane<sup>\*,‡</sup> and Sanjib Banerjee<sup>\*,†</sup>

<sup>†</sup>Department of Chemistry, Indian Institute of Technology Bhilai, Raipur 492015, Chhattisgarh, India

<sup>‡</sup>Polymer Science and Engineering Division, CSIR-National Chemical Laboratory, Pune, Maharashtra 411008, India

\*Corresponding Author: E-mail: sanjib.banerjee@iitbhilai.ac.in (S. Banerjee)

s.mane@ncl.res.in (S. R. Mane)

## Table of contents :

|                                                                                                                                                                                                                                                                                                                                     |               |
|-------------------------------------------------------------------------------------------------------------------------------------------------------------------------------------------------------------------------------------------------------------------------------------------------------------------------------------|---------------|
| <b>A. Supporting Tables, Schemes and Figures.....</b>                                                                                                                                                                                                                                                                               | <b>S3-S11</b> |
| Table S1. Characterization data of PDMAEMA- <i>b</i> -PB- <i>b</i> -PDMAEMA.....                                                                                                                                                                                                                                                    | S3            |
| Table S2. Catalyst recyclability study.....                                                                                                                                                                                                                                                                                         | S3            |
| Scheme S1. Synthesis of CysMAM.....                                                                                                                                                                                                                                                                                                 | S4            |
| Fig. S1 ATR-IR spectra of L-cysteine (a) and CysMAM.....                                                                                                                                                                                                                                                                            | S5            |
| Fig. S2 <sup>1</sup> H NMR spectrum of CysMAM .....                                                                                                                                                                                                                                                                                 | S6            |
| Fig. S3 <sup>1</sup> H NMR spectrum of monohydroxyl-terminated polybutadiene.....                                                                                                                                                                                                                                                   | S6            |
| Fig. S4 <sup>1</sup> H NMR spectrum of dihydroxyl-terminated polybutadiene.....                                                                                                                                                                                                                                                     | S7            |
| Fig. S5 <sup>1</sup> H NMR spectrum of dibromo-terminated polybutadiene.....                                                                                                                                                                                                                                                        | S7            |
| Fig. S6 <sup>1</sup> H NMR spectrum of PDMAEMA <sub>25</sub> - <i>b</i> -PB <sub>22</sub> - <i>b</i> -PDMAEMA <sub>25</sub> .....                                                                                                                                                                                                   | S8            |
| Fig. S7 ATR-IR spectra of PB <sub>22</sub> , Br-PB <sub>22</sub> -Br and PDMAEMA <sub>25</sub> - <i>b</i> -PB <sub>22</sub> - <i>b</i> -PDMAEMA <sub>25</sub> and<br>PCysMAM <sub>25</sub> - <i>b</i> -PDMAEMA <sub>25</sub> - <i>b</i> -PB <sub>22</sub> - <i>b</i> -PDMAEMA <sub>25</sub> - <i>b</i> -PCysMAM <sub>25</sub> ..... | S8            |
| Fig. S8 Kinetics study of alloy-mediated RDRP of DMAEMA.....                                                                                                                                                                                                                                                                        | S9            |
| Fig. S9 <sup>1</sup> H NMR spectrum of PCysMAM <sub>25</sub> - <i>b</i> -PDMAEMA <sub>25</sub> - <i>b</i> -PB <sub>22</sub> - <i>b</i> -PDMAEMA <sub>25</sub> - <i>b</i> -<br>PCysMAM <sub>25</sub> . .....                                                                                                                         | S9            |
| Fig. S10 Size distributions of the PCysMAM <sub>25</sub> - <i>b</i> -PDMAEMA <sub>25</sub> - <i>b</i> -PB <sub>22</sub> - <i>b</i> -PDMAEMA <sub>25</sub> - <i>b</i> -<br>PCysMAM <sub>25</sub> pentablock copolymer aggregates by DLS .....                                                                                        | S10           |
| Fig. S11 Size distributions of the PCysMAM <sub>25</sub> - <i>b</i> -PDMAEMA <sub>25</sub> - <i>b</i> -PB <sub>22</sub> - <i>b</i> -PDMAEMA <sub>25</sub> - <i>b</i> -<br>PCysMAM <sub>25</sub> pentablock copolymer aggregates at pH 9.5 and 1.5 by DLS.                                                                           |               |
| Fig. S12 Plot of the hydrodynamic diameter ( $D_h$ ) as a function of temperature for an<br>aqueous solution of PCysMAM <sub>25</sub> - <i>b</i> -PDMAEMA <sub>25</sub> - <i>b</i> -PB <sub>22</sub> - <i>b</i> -PDMAEMA <sub>25</sub> - <i>b</i> -<br>PCysMAM <sub>25</sub> pentablock copolymer. ....                             | S11           |
| <b>B. References.....</b>                                                                                                                                                                                                                                                                                                           | <b>S12</b>    |

## A. Supporting Tables, Schemes and Figures

**Table S1.** Reaction conditions and molecular characterization data of PDMAEMA-*b*-PB-*b*-PDMAEMA triblock copolymers.<sup>a</sup>

| Entry | Polymer                                                                                    | [DMAEMA] <sub>0</sub> /<br>[Br-PB <sub>22</sub> -Br] <sub>0</sub> | Conv. <sup>b</sup><br>(%) | $M_{n,theo}$ <sup>c</sup><br>(g mol <sup>-1</sup> ) | $M_{n,NMR}$ <sup>d</sup><br>(g mol <sup>-1</sup> ) | $M_{n,SEC}$ <sup>e</sup><br>(g mol <sup>-1</sup> ) | $\bar{D}$ <sup>e</sup> |
|-------|--------------------------------------------------------------------------------------------|-------------------------------------------------------------------|---------------------------|-----------------------------------------------------|----------------------------------------------------|----------------------------------------------------|------------------------|
| P1    | PDMAEMA <sub>25</sub> - <i>b</i> -PB <sub>22</sub> - <i>b</i> -<br>PDMAEMA <sub>25</sub>   | 50: 22                                                            | 87                        | 10300                                               | 9900                                               | 10100                                              | 1.17                   |
| P2    | PDMAEMA <sub>50</sub> - <i>b</i> -PB <sub>22</sub> - <i>b</i> -<br>PDMAEMA <sub>50</sub>   | 100: 22                                                           | 85                        | 22500                                               | 21400                                              | 22200                                              | 1.16                   |
| P3    | PDMAEMA <sub>75</sub> - <i>b</i> -PB <sub>22</sub> - <i>b</i> -<br>PDMAEMA <sub>75</sub>   | 150: 22                                                           | 88                        | 32900                                               | 32100                                              | 32600                                              | 1.18                   |
| P4    | PDMAEMA <sub>100</sub> - <i>b</i> -PB <sub>22</sub> - <i>b</i> -<br>PDMAEMA <sub>100</sub> | 200: 22                                                           | 82                        | 40100                                               | 37400                                              | 38800                                              | 1.17                   |

<sup>a</sup>Reaction conditions: solvent = THF; catalyst = Ni-Co alloy; ligand = Me<sub>6</sub>TREN; temperature = 25 °C; time = 24 h. <sup>b</sup>Determined gravimetrically based on monomer feed. <sup>c</sup>Calculated using yield as conversion and the following equation:  $M_{n,theo} = ([DMAEMA]_0/[Br-PB_{22}-Br]_0 \times \text{yield} \times M_{DMAEMA}) + M_{Br-PB_{22}-Br}$ , where  $M_{DMAEMA}$  (= 157 g mol<sup>-1</sup>) and  $M_{Br-PB_{22}-Br}$  (= 1350 g mol<sup>-1</sup>) are the molecular weight of DMAEMA and Br-PB<sub>22</sub>-Br, respectively. <sup>d</sup>Determined by <sup>1</sup>HNMR (see equation 5 in the Experimental Section for details). <sup>e</sup>Obtained from SEC measurements.

**Table S2.** Catalyst recyclability study for alloy-mediated RDRP of DMAEMA from Br-PB<sub>22</sub>-Br macroinitiator.<sup>a</sup>

| Entry | Cycle           | Conv. <sup>b</sup><br>(%) | $M_{n,theo}$ <sup>c</sup><br>(g mol <sup>-1</sup> ) | $M_{n,SEC}$ <sup>d</sup><br>(g mol <sup>-1</sup> ) | $\bar{D}$ <sup>d</sup> |
|-------|-----------------|---------------------------|-----------------------------------------------------|----------------------------------------------------|------------------------|
| P1    | 1 <sup>st</sup> | 86                        | 10250                                               | 9900                                               | 1.17                   |
| P2    | 2 <sup>nd</sup> | 86                        | 10250                                               | 9800                                               | 1.16                   |
| P3    | 3 <sup>rd</sup> | 85                        | 10200                                               | 9800                                               | 1.17                   |
| P4    | 4 <sup>th</sup> | 84                        | 10100                                               | 9700                                               | 1.16                   |
| P5    | 5 <sup>th</sup> | 82                        | 9900                                                | 9800                                               | 1.15                   |

<sup>a</sup>Reaction conditions: solvent = THF; catalyst = Ni-Co alloy; ligand = Me<sub>6</sub>TREN; temperature = 25 °C; time = 24 h. <sup>b</sup>Determined gravimetrically. <sup>c</sup>Calculated using the following equation:  $M_{n,theo} = ([DMAEMA]_0/[Br-PB_{22}-Br]_0 \times \text{yield} \times M_{DMAEMA}) + M_{Br-PB_{22}-Br}$ , where  $M_{DMAEMA}$  (= 157 g mol<sup>-1</sup>) and  $M_{Br-PB_{22}-Br}$  (= 1350 g mol<sup>-1</sup>) are the molecular weight of DMAEMA and Br-PB<sub>22</sub>-Br, respectively. <sup>d</sup>Obtained from SEC measurements.

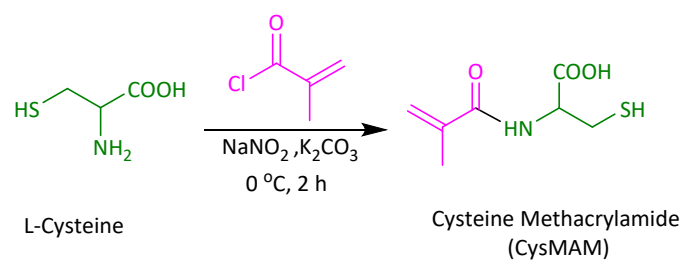

**Scheme S1** Synthesis of L-cysteine methacrylamide (CysMAM).

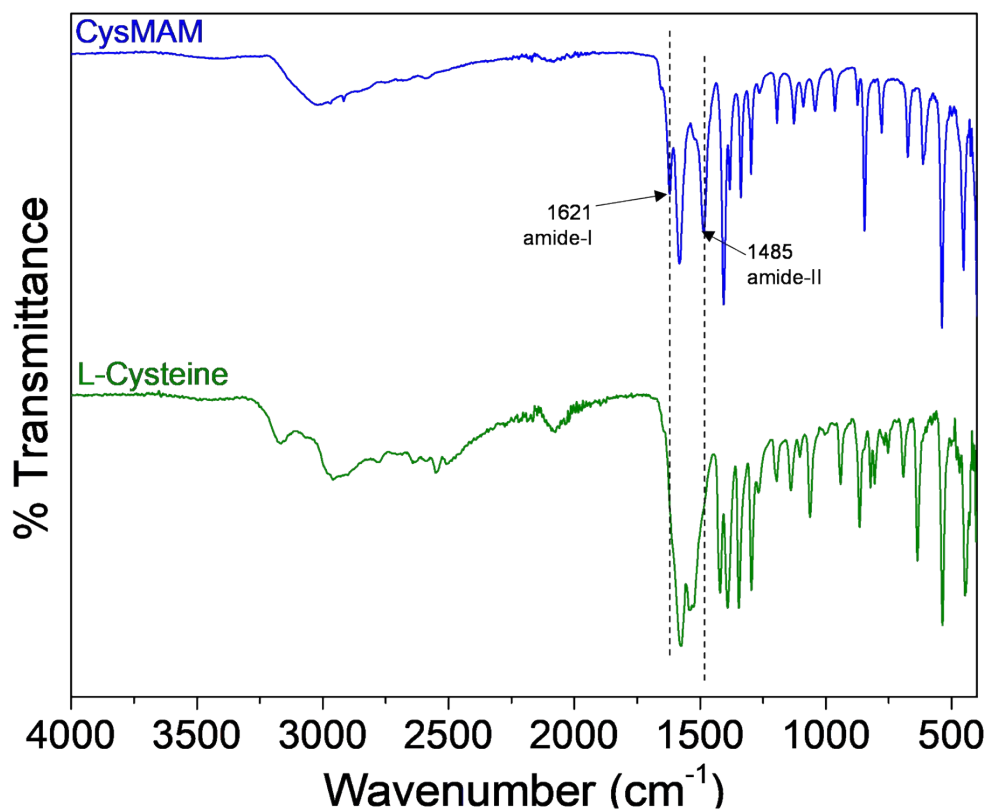

**Fig. S1** ATR-IR spectra of L-cysteine and CysMAM.

L-Cysteine methacrylamide was prepared by coupling with L-cysteine monomer with methacryloyl chloride. This was confirmed by two characteristic amide I and amide II absorption bands at 1621 and 1485 cm<sup>-1</sup>, respectively (Fig. S1).<sup>1</sup>

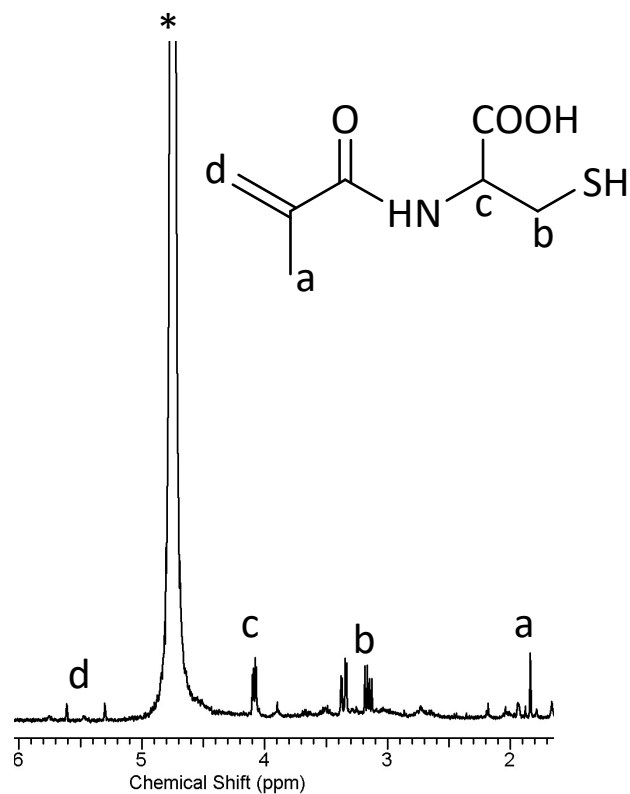

**Fig. S2** <sup>1</sup>H NMR spectrum of CysMAM. (\*) Solvent (D<sub>2</sub>O) peak.

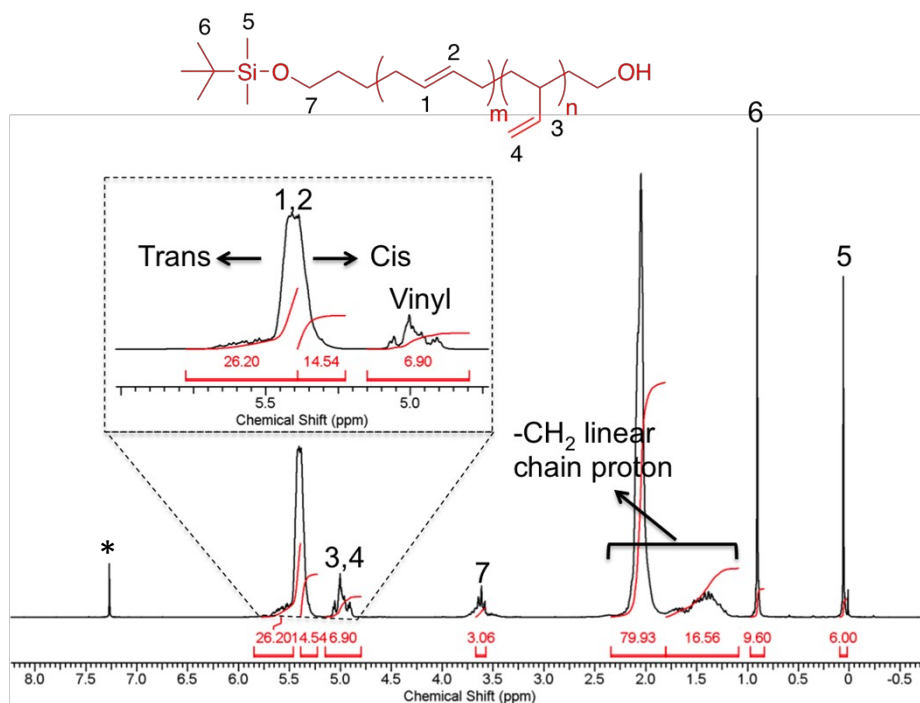

**Fig. S3** <sup>1</sup>H NMR spectrum of monohydroxyl-terminated polybutadiene polymer. (\*) Solvent (CDCl<sub>3</sub>) peak.

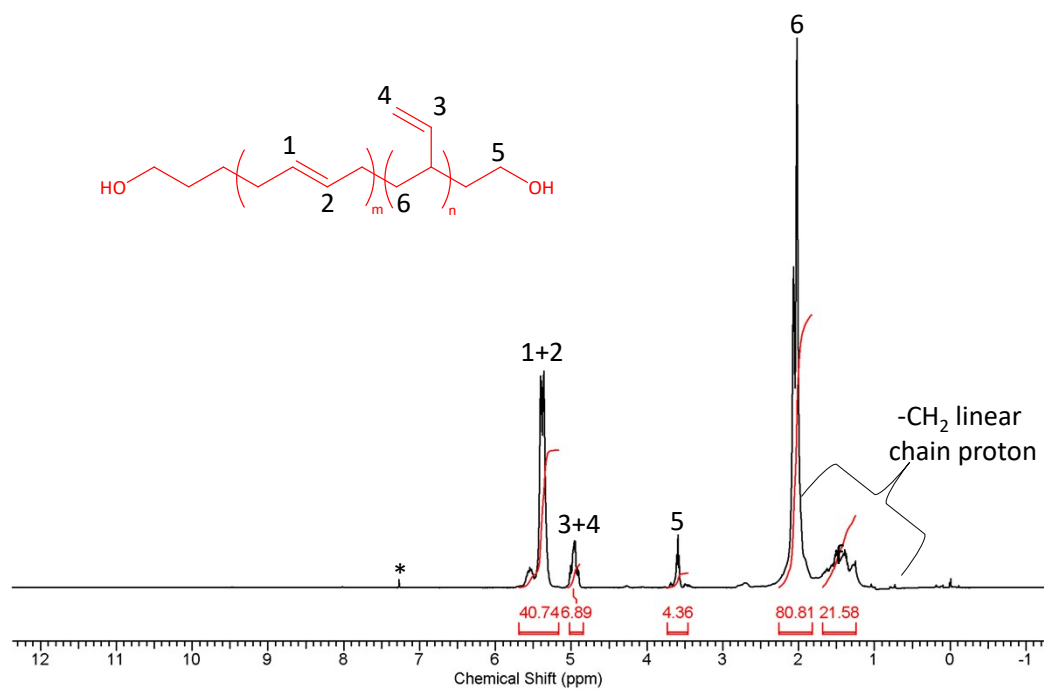

**Fig. S4** <sup>1</sup>H NMR spectrum of dihydroxyl-terminated polybutadiene polymer (PB). (\*) Solvent (CDCl<sub>3</sub>) peak.

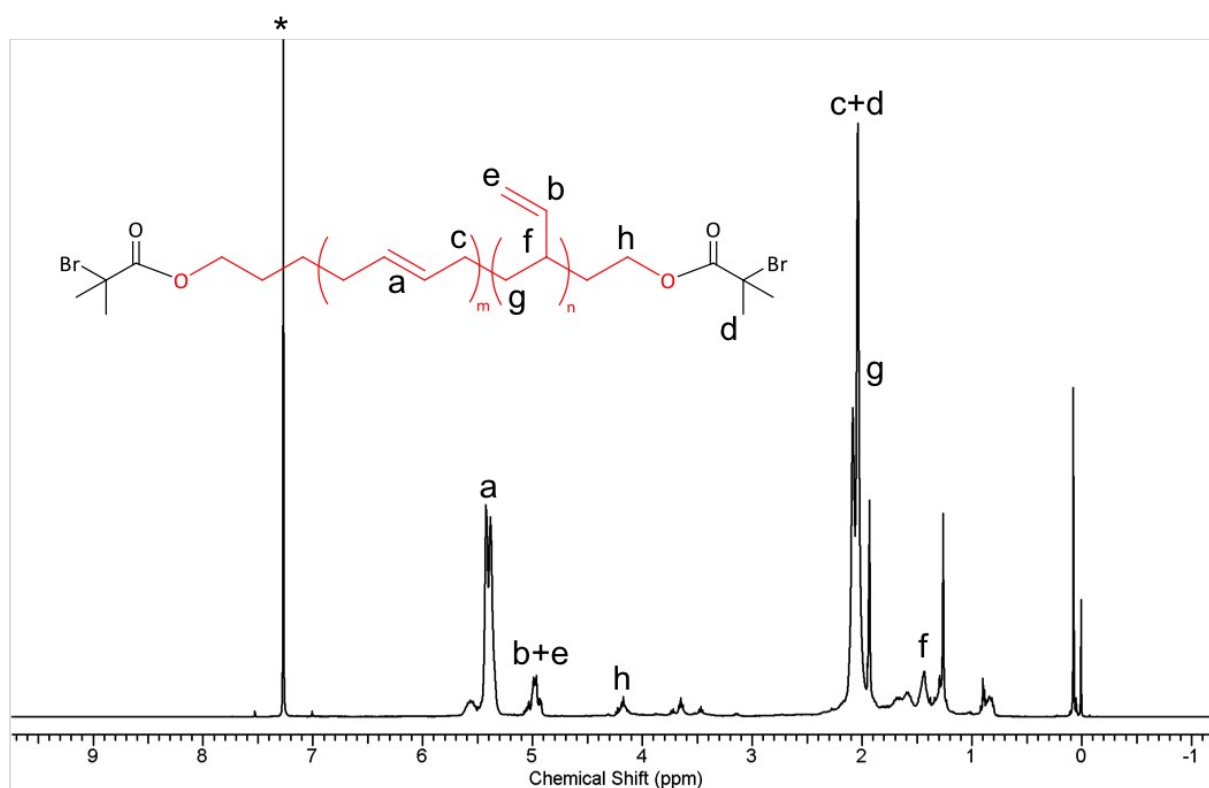

**Fig. S5** <sup>1</sup>H NMR spectrum of dibromo-terminated polybutadiene polymer (Br-PB<sub>22</sub>-Br). (\*) Solvent (CDCl<sub>3</sub>) peak.

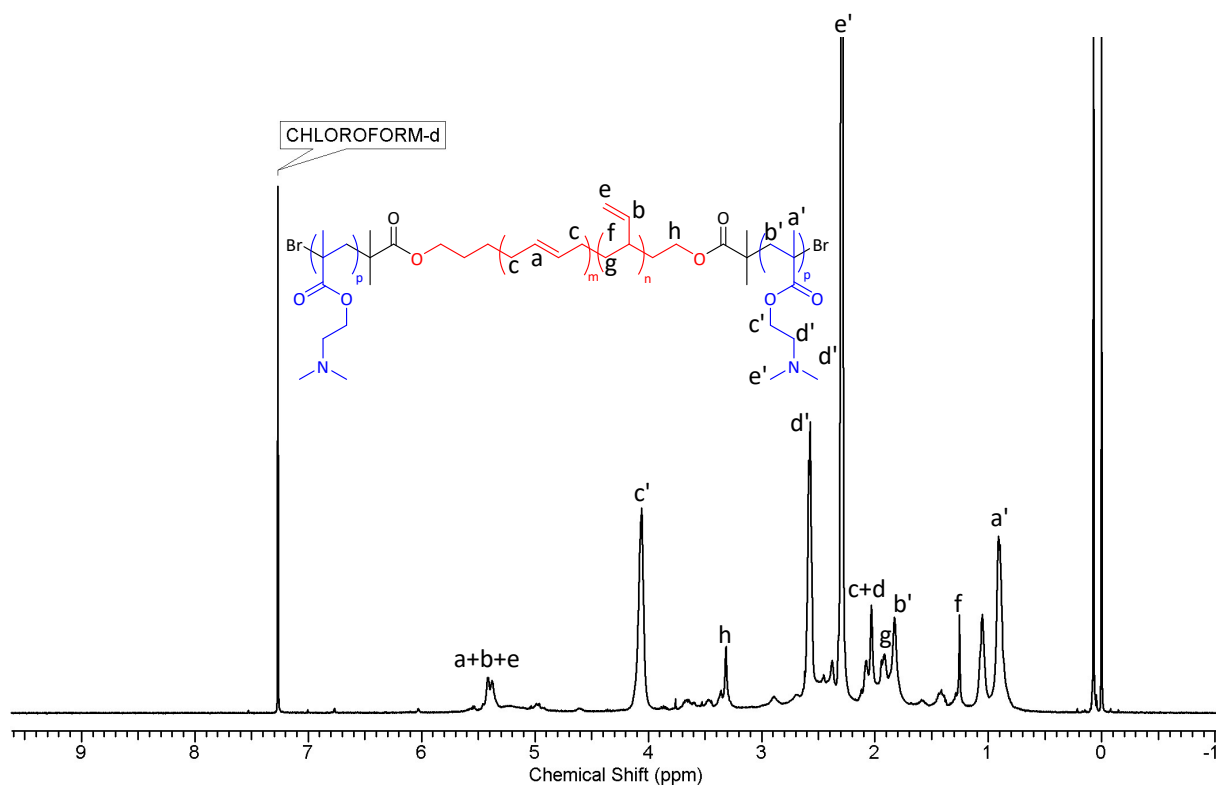

**Fig. S6**  $^1\text{H}$  NMR spectrum of PDMAEMA<sub>25</sub>-*b*-PB<sub>22</sub>-*b*-PDMAEMA<sub>25</sub> triblock copolymer (P1, Table S1).

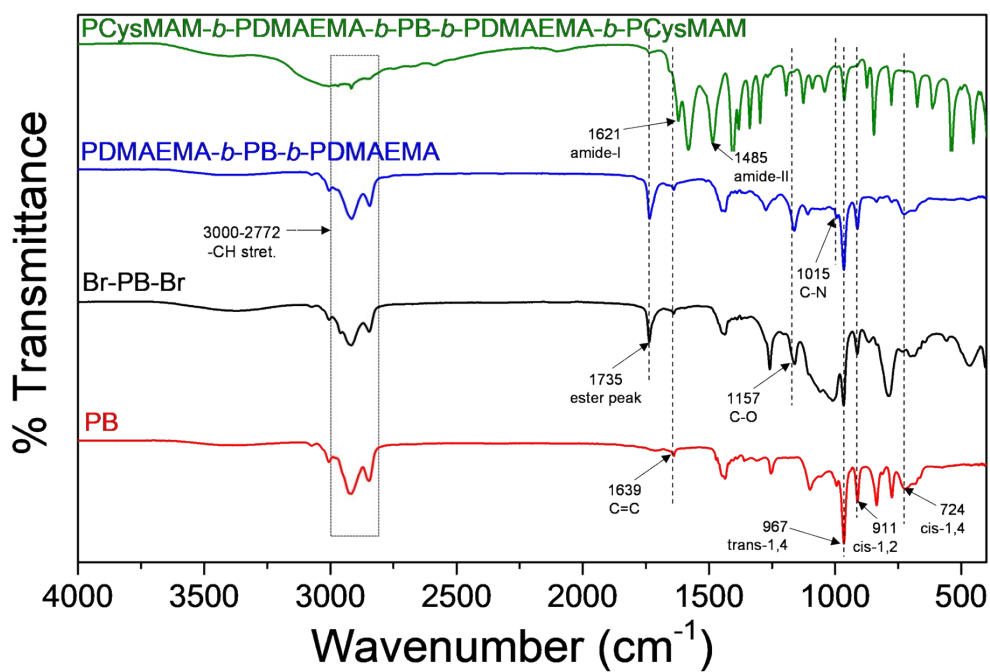

**Fig. S7** ATR-IR spectra of PB<sub>22</sub> (a), Br-PB<sub>22</sub>-Br macroinitiator (b), PDMAEMA<sub>25</sub>-*b*-PB<sub>22</sub>-*b*-PDMAEMA<sub>25</sub> (c) and PCysMAM<sub>25</sub>-*b*-PDMAEMA<sub>25</sub>-*b*-PB<sub>22</sub>-*b*-PDMAEMA<sub>25</sub>-*b*-PCysMAM<sub>25</sub> (d).



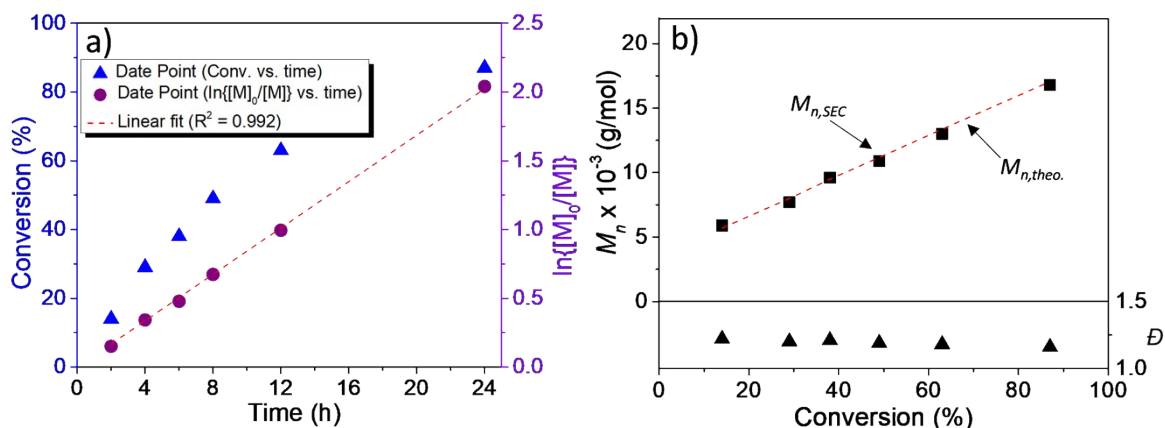

**Fig. S8** Plot of a) conversion vs. time,  $\ln\{[M]_0/[M]\}$  vs. time and b) evolution of  $M_n$  and  $\bar{D}$  with increasing monomer conversion for alloy-mediated RDRP of DMAEMA in THF at 25 °C using Br-PB-Br as the macroinitiator. The non-zero value of  $M_n$  at zero conversion is because the Br-PB-Br macroinitiator was used in the polymerization.

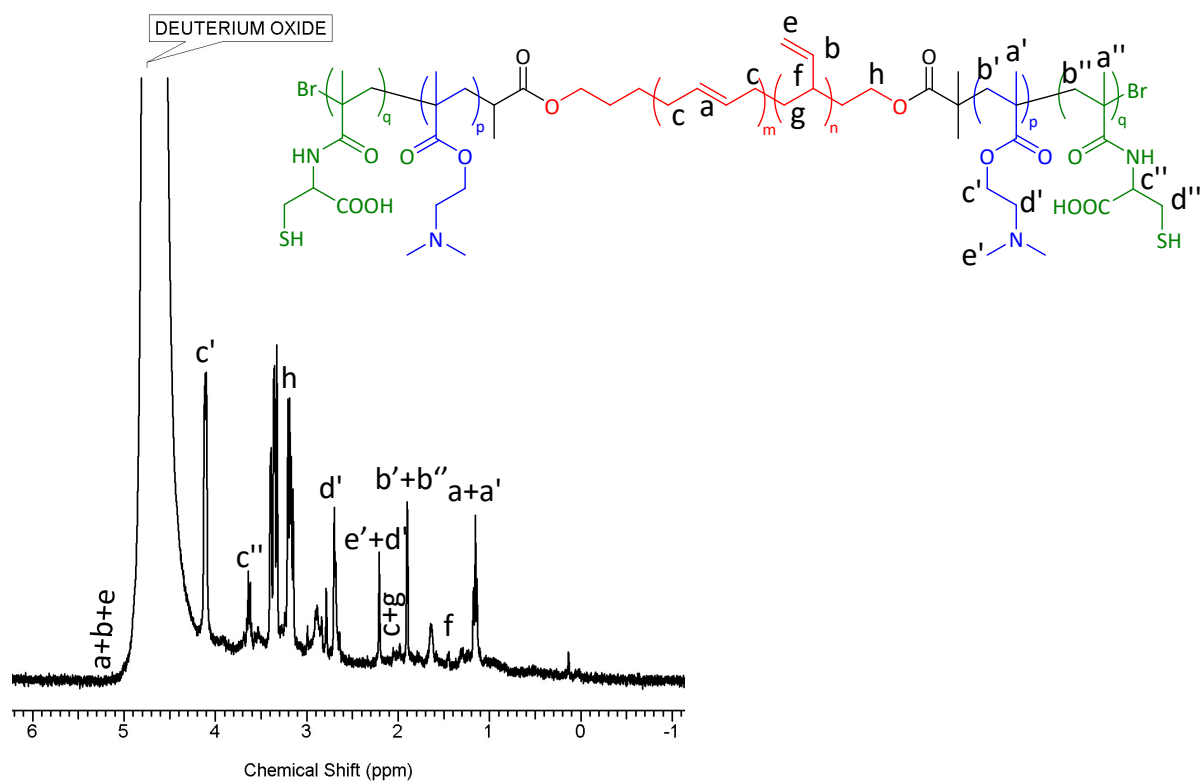

**Fig. S9**  $^1\text{H}$  NMR spectrum of PCysMAM<sub>25</sub>-*b*-PDMAEMA<sub>25</sub>-*b*-PB<sub>22</sub>-*b*-PDMAEMA<sub>25</sub>-*b*-PCysMAM<sub>25</sub> pentablock copolymer (P2, Table 1). (\*) Solvent (D<sub>2</sub>O) peak.

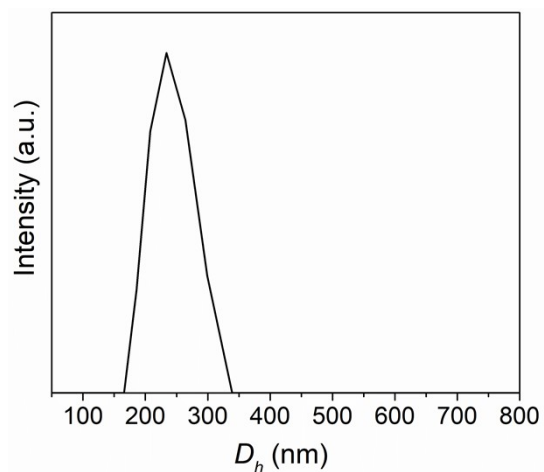

**Fig. S10** Size distributions of the PCysMAM<sub>25</sub>-*b*-PDMAEMA<sub>25</sub>-*b*-PB<sub>22</sub>-*b*-PDMAEMA<sub>25</sub>-*b*-PCysMAM<sub>25</sub> pentablock copolymer aggregates by DLS.

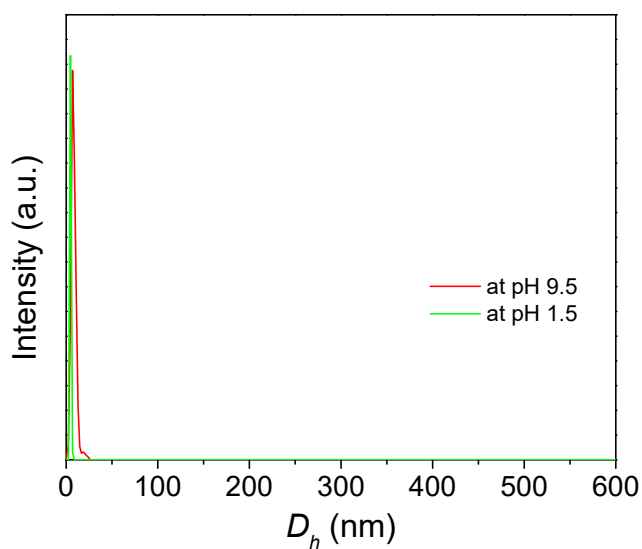

**Fig. S11** Size distributions of the PCysMAM<sub>25</sub>-*b*-PDMAEMA<sub>25</sub>-*b*-PB<sub>22</sub>-*b*-PDMAEMA<sub>25</sub>-*b*-PCysMAM<sub>25</sub> pentablock copolymer aggregates at pH 9.5 and 1.5 by DLS.

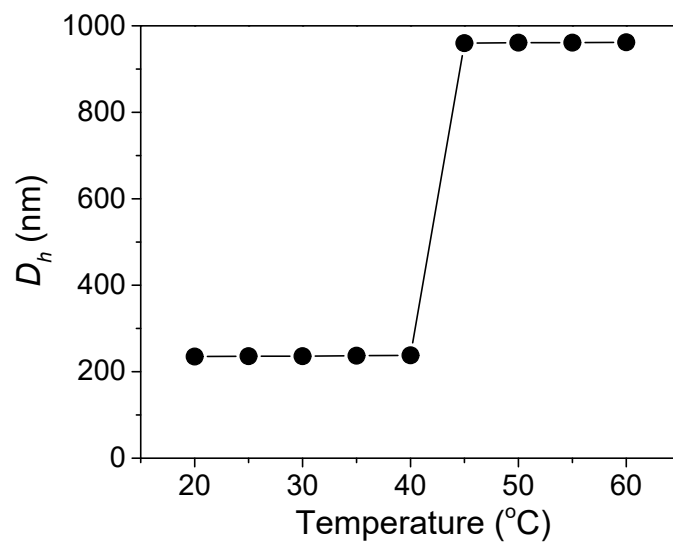

**Fig. S12** Plot of the hydrodynamic diameter ( $D_h$ ) as a function of temperature for an aqueous solution of PCysMAM<sub>25</sub>-*b*-PDMAEMA<sub>25</sub>-*b*-PB<sub>22</sub>-*b*-PDMAEMA<sub>25</sub>-*b*-PCysMAM<sub>25</sub> pentablock copolymer at pH 7.

**B. References.**

1. B. B. Prasad, D. Jauhari and M. P. Tiwari, *Biosens. Bioelectron.*, 2014, **59**, 81-88.
